# Supplementary material
Source: publisher figshare collection journal article supplement (https://gsajournals.figshare.com/ndownloader/files/20720469)
Supplement: Supplementary file 1 [file 20720469]

**Supplementary Figures and Tables**

**Fig. S1.** The correlation between π0/π4 and π4 in log scale for selected species.

**Fig. S2** The correlation between π0 and π4 in linear scale for selected species

**Fig S3** The correlation between π0 and π4 in log scale for selected species

**Fig S4** The relative difference between observed SFS and expected SFS under gamma DFE (red: synonymous sites; orange: non-synonymous sites) or full DFE model (cyan: synonymous sites; navy: non-synonymous sites).

**Fig. S5** The correlation between Tajima’s D and πS depending on Sb (left), N (middle); And the correlation between Δ and Tajima’s D (right) in Slim simulations of recombination Nr=1e-3.

**Fig. S6** The correlation between Tajima’s D and πS depending on Sb (left), N (middle); And the correlation between Δ and Tajima’s D (right) in Slim simulations with recombination Nr=1e-2.

**Table S3**. Mutation rates used for 11 species used in the current study for estimation of Ne.

|  | *μ* **(x1e-9)** | | |
| --- | --- | --- | --- |
| Species | Mutation accumulation lines | *dsyn* | used for Ne |
| *A. thaliana* | 7[1] | 6.31 [2] | 7 |
| *A. lyrata* | n.a. | 6.31[2] | 7 |
| *C. rubella* | n.a. | 7.85[3] | 7 |
| *C. grandiflora* | n.a. | 7.85[3] | 7 |
| *S. habrochaites* | n.a. | 5.2[4] | 5.2 |
| *S. huaylasense* | n.a. | 5.2[4] | 5.2 |
| *S. propinquum* | n.a. | 10[5, 6] | 10 |
| *Z. mays* | n.a. | 29[7] | 29 |
| *P. trichocarpa* | n.a. | 37.5[8, 9] | 37.5 |
| *D. melanogaster* | 2.8 [10] | 3.3[11] | 2.8 |
| *H. timareta* | 2.9 [10] | 1.9[12] | 2.9 |

**Table S4** The goodness of fit tests on SFS of both gamma DFE and full DFE models (df, *χ*2, and *p* values were listed)

|  | df | Gamma DFE (*χ*2, *p*) | Full DFE (*χ*2, *p*) |
| --- | --- | --- | --- |
| *A. thaliana* | 16 | 28.05, **0.031** | 28.05, **0.031** |
| *A. lyrata* | 16 | 34.82, **0.0042** | 34.98, **0.0040** |
| *C. rubella* | 16 | 18.97, 0.27 | 17.50, 0.35 |
| *C. grandiflora* | 28 | 26.21, 0.56 | 16.93, 0.95 |
| *S. habrochaites* | 10 | 20.19, **0.027** | 9.93, 0.45 |
| *S. huaylasense* | 4 | 41.54, **2.079e-08** | 3.24, 0.52 |
| *Z. mays* | 16 | 8.08, 0.95 | 8.08, 0.95 |
| *S. propinquum* | 10 | 24.34, **0.0067** | 24.34, **0.0067** |
| *P. trichocarpa* | 28 | 29.30, 0.40 | 23.00, 0.73 |
| *H. timareta* | 12 | 39.40, **9.052e-05** | 37.98, **1.56e-04** |
| *D. melanogaster* | 36 | 154.57, **1.11e-16** | 33.01, 0.61 |

**Table S5** Test for the invariance of DFE parameter estimates across bins by comparing the log-likelihoods of independent estimates for each bin against those of shared estimates.

| **Species** | Δ **loglk**  **(full DFE)** | Δ Df | p-value | Δ **loglk (gamma DFE)** | Δ Df | p-value |
| --- | --- | --- | --- | --- | --- | --- |
| *A. thaliana* | 1361.4 | 16 | 0 | 1005.9 | 8 | 0 |
| *A. lyrata* | 1327.6 | 16 | 0 | 695.9 | 8 | 3.19e-295 |
| *C. rubella* | 704.8 | 16 | 1.45e-290 | 578.6 | 8 | 1.65e-244 |
| *C. grandiflora* | 1018.5 | 16 | 0 | 778.2 | 8 | 0 |
| *S. habrochaites* | 204.4 | 16 | 5.10e-77 | 196.4 | 8 | 6.54e-80 |
| *S. huaylasense* | 558.5 | 16 | 9.27e-228 | 526.6 | 8 | 5.07e-222 |
| *S. propinquum* | 678.4 | 16 | 3.30e-279 | 543.7 | 8 | 1.95e-229 |
| *Z. mays* | 721.8 | 16 | 7.00e-298 | 616.3 | 8 | 8.84e-261 |
| *P. trichocarpa* | 284.4 | 16 | 9.83e-111 | 307.5 | 8 | 1.45e-127 |
| *D. melanogaster* | 169.9 | 16 | 1.26e-62 | 502.7 | 8 | 1.07e-211 |
| *H. timareta* | 671.5 | 16 | 2.88e-276 | 543.7 | 8 | 2.01e-229 |

1. Ossowski, S., et al., *The Rate and Molecular Spectrum of Spontaneous Mutations in Arabidopsis thaliana.* Science, 2010. **327**(5961): p. 92-94.

2. Payne, B.L. and D. Alvarez-Ponce, *Higher Rates of Protein Evolution in the Self-Fertilizing Plant Arabidopsis thaliana than in the Out-Crossers Arabidopsis lyrata and Arabidopsis halleri.* Genome Biology and Evolution, 2018. **10**(3): p. 895-900.

3. Koch, M.A. and M. Kiefer, *Genome evolution among cruciferous plants: A lecture from the comparison of the genetic maps of three diploid species - Capsella rubella, Arabidopsis lyrata subsp Petraea, and A. thaliana.* American Journal of Botany, 2005. **92**(4): p. 761-767.

4. Roselius, K., W. Stephan, and T. Stadler, *The relationship of nucleotide polymorphism, recombination rate and selection in wild tomato species.* Genetics, 2005. **171**(2): p. 753-763.

5. Gossmann, T.I., et al., *Genome Wide Analyses Reveal Little Evidence for Adaptive Evolution in Many Plant Species.* Molecular Biology and Evolution, 2010. **27**(8): p. 1822-1832.

6. Swigonova, Z., et al., *Close split of sorghum and maize genome progenitors.* Genome Research, 2004. **14**(10a): p. 1916-1923.

7. Clark, R.M., S. Tavare, and J. Doebley, *Estimating a nucleotide substitution rate for maize from polymorphism at a major domestication locus.* Molecular Biology and Evolution, 2005. **22**(11): p. 2304-2312.

8. Tuskan, G.A., et al., *The genome of black cottonwood, Populus trichocarpa (Torr. & Gray).* Science, 2006. **313**(5793): p. 1596-1604.

9. Ingvarsson, P.K., *Multilocus patterns of nucleotide polymorphism and the demographic history of Populus tremula.* Genetics, 2008. **180**(1): p. 329-340.

10. Keightley, P.D., et al., *Estimation of the Spontaneous Mutation Rate per Nucleotide Site in a Drosophila melanogaster Full-Sib Family.* Genetics, 2014. **196**(1): p. 313-+.

11. Obbard, D.J., et al., *Estimating Divergence Dates and Substitution Rates in the Drosophila Phylogeny.* Molecular Biology and Evolution, 2012. **29**(11): p. 3459-3473.

12. Martin, S.H., et al., *Natural Selection and Genetic Diversity in the Butterfly Heliconius melpomene.* Genetics, 2016. **203**(1): p. 525-+.
